# Supplementary material for: Organization of brain networks governed by long-range connections index autistic traits in the general population
Source: PubMed Central journal article supplement (PMC3698083; doi:10.1186/1866-1955-5-16), 2013-06-27
Supplement: 1866-1955-5-16-S3.pdf [file 1866-1955-5-16-S3.pdf]

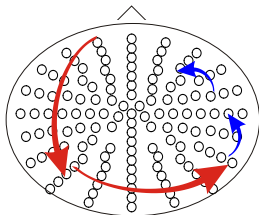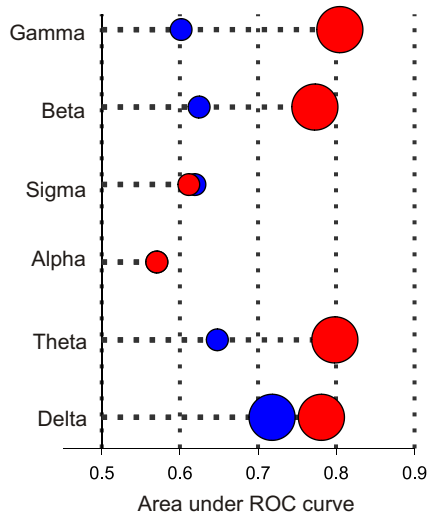

**Blue square** Short distances (first tertile)

**Small black circle** P > 0.01, Bonferroni corrected

**Red square** Long distances (third tertile)

**Large black circle** P < 0.01, Bonferroni corrected
